# Supplementary material
Source: Springer Nature journal article supplement (https://www.springermedizin.de/resource/supplementary/40164_2013_52_MOESM3_ESM.pdf/9687078)

a

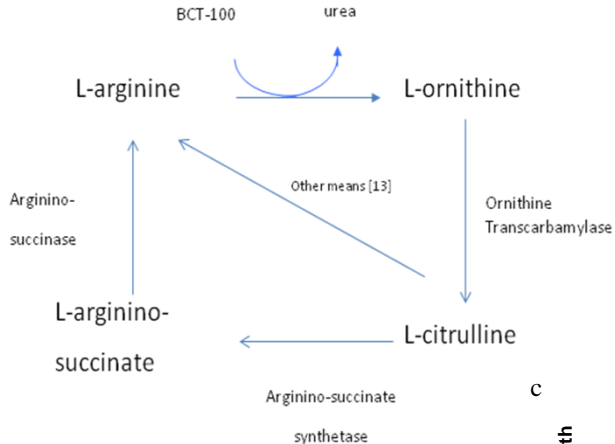

b

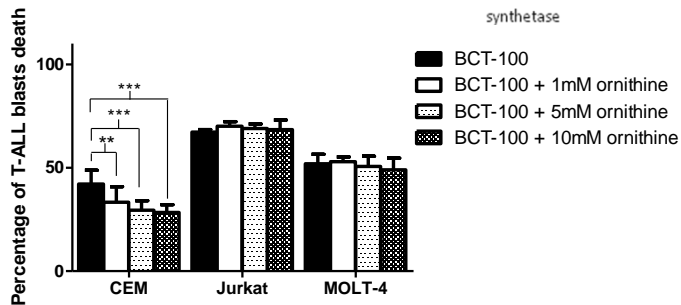

c

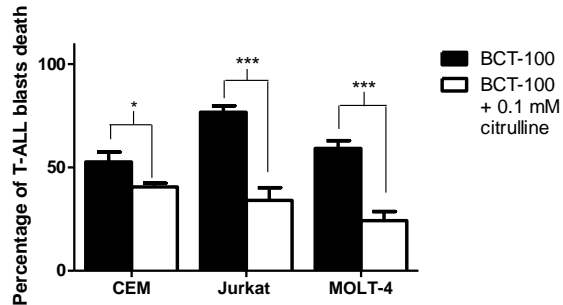

Supplement: MOESM3 [file 9687078]
